# Supplementary material for: Leonurine inhibits cardiomyocyte pyroptosis to attenuate cardiac fibrosis via the TGF-β/Smad2 signalling pathway
Source: PubMed Central journal article supplement (PMC9632889; doi:10.1371/journal.pone.0275258), 2022-11-03

# Fig. 4A

FN1, COL3A1,  $\alpha$ -SMA, and  $\beta$ -actin were run on the same gel, cut before incubation with antibodies, and detected using a GE Amersham Imager 800 RGB (EG, USA).

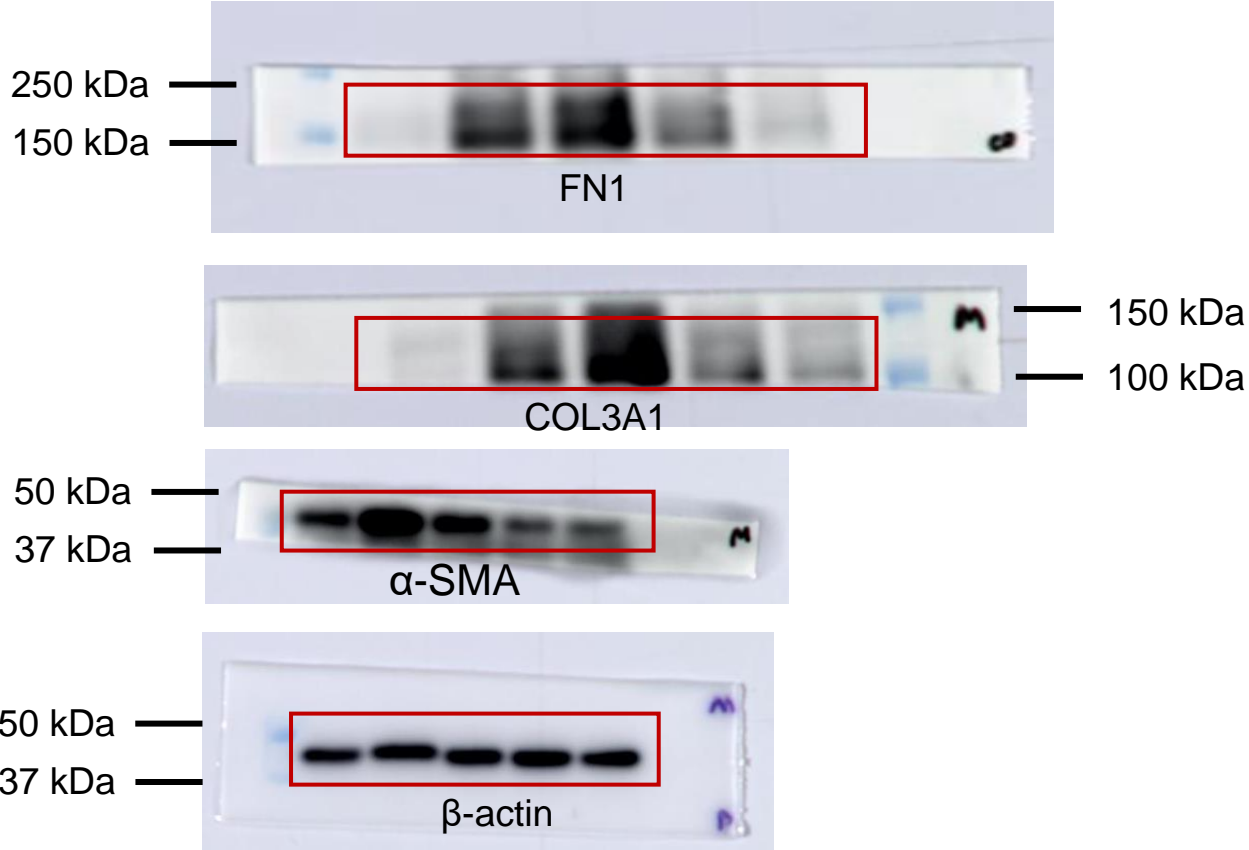

# Fig. 5A

GSDMD, Caspase 1, Cleaved GSDMD, Cleaved Caspase 1, and  $\beta$ -actin were run on the same gel, cut before incubation with antibodies, and detected using a GE Amersham Imager 800 RGB (EG, USA).

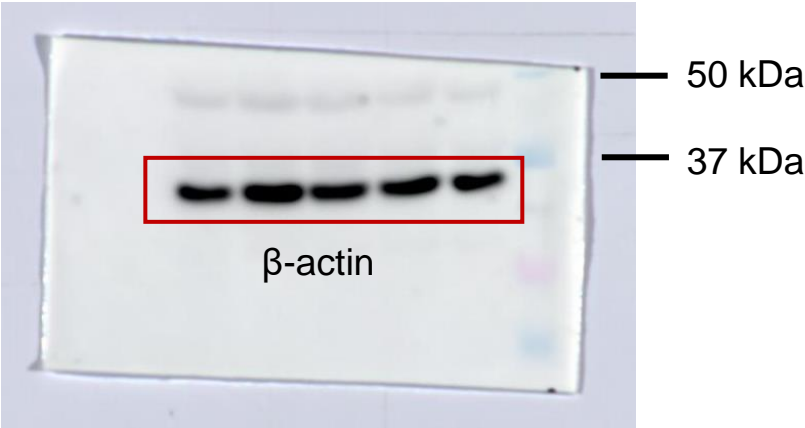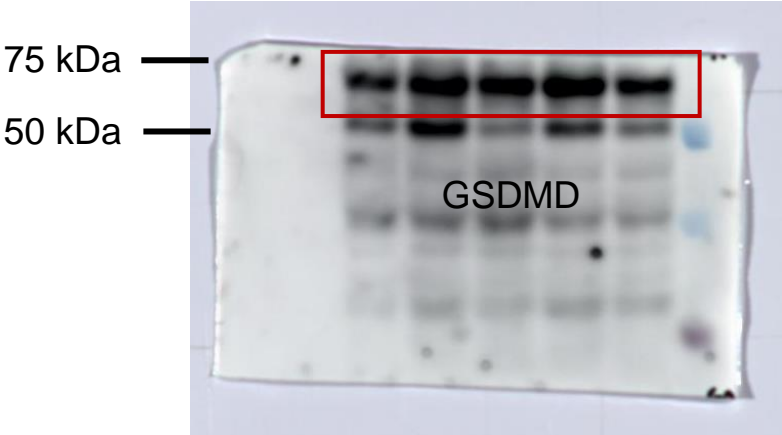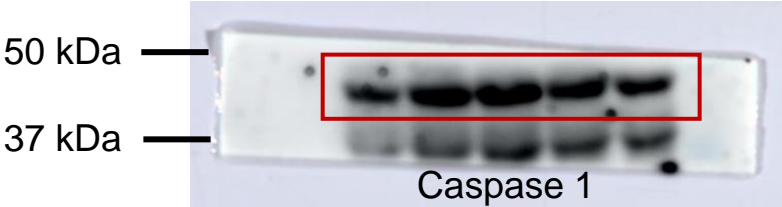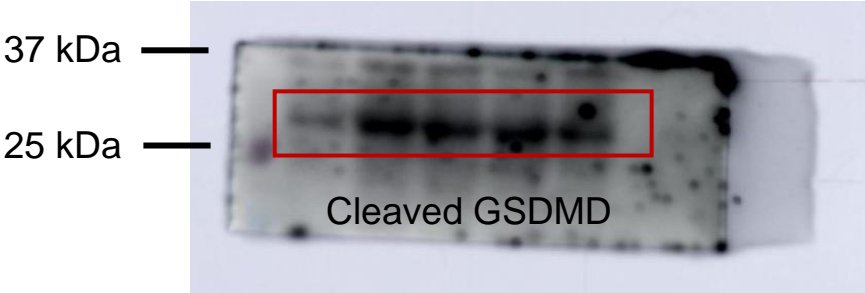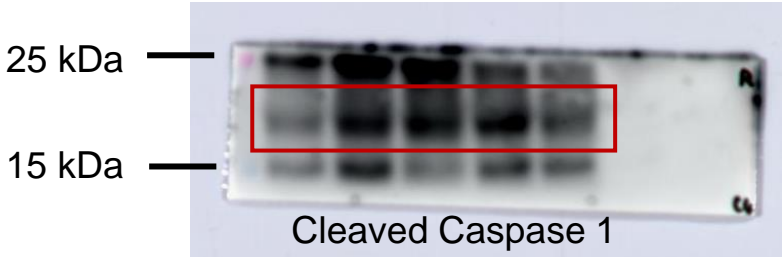

# Fig. 6A

FN1, COL3A1,  $\alpha$ -SMA, and  $\beta$ -actin were run on the same gel, cut before incubation with antibodies, and detected using a GE Amersham Imager 800 RGB (EG, USA).

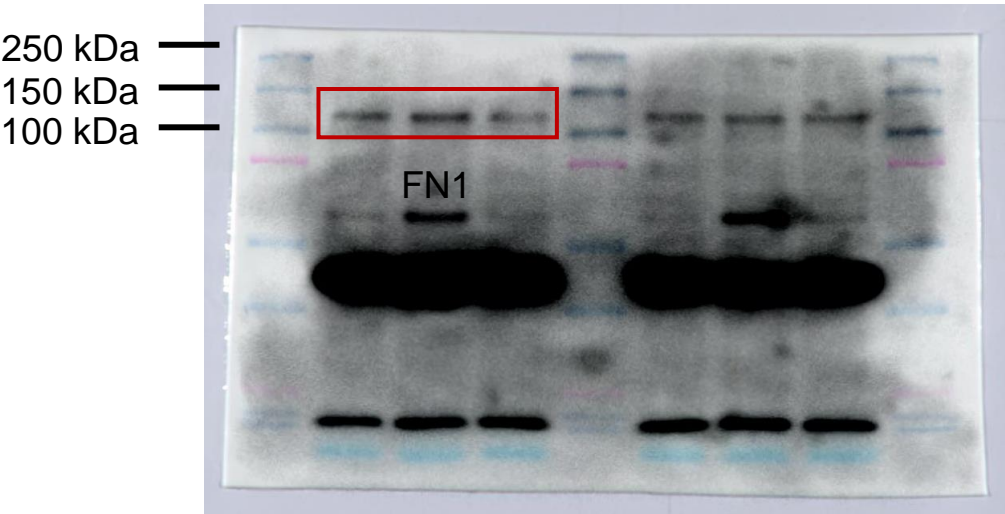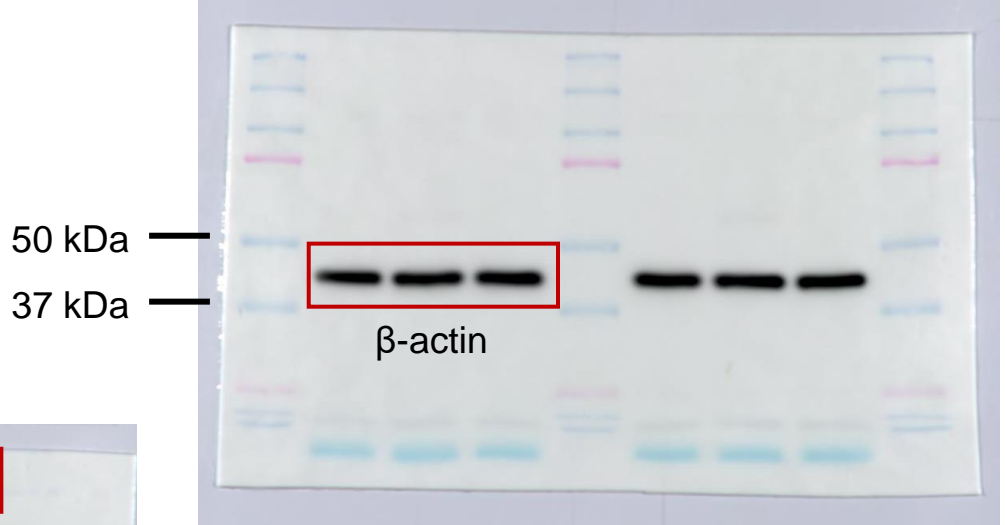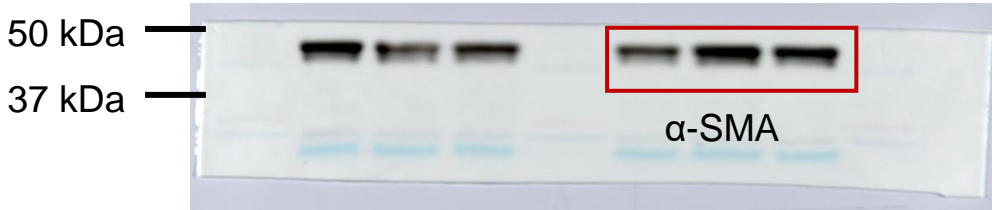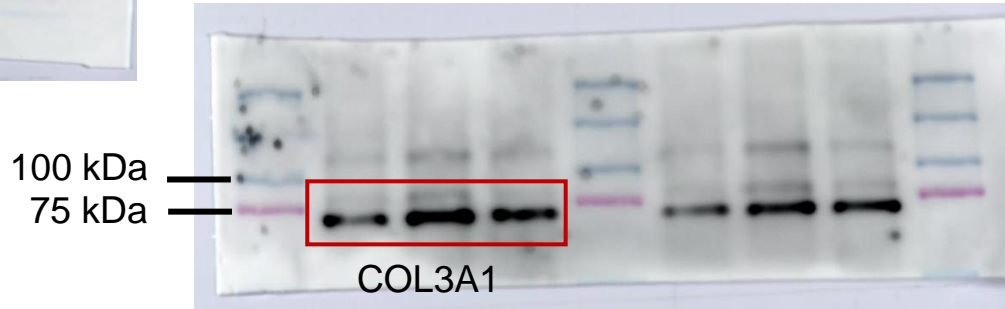

# Fig. 7A

GSDMD, Caspase 1, Cleaved GSDMD, Cleaved Caspase 1, and  $\beta$ -actin were run on the same gel, cut before incubation with antibodies, and detected using a GE Amersham Imager 800 RGB (EG, USA).

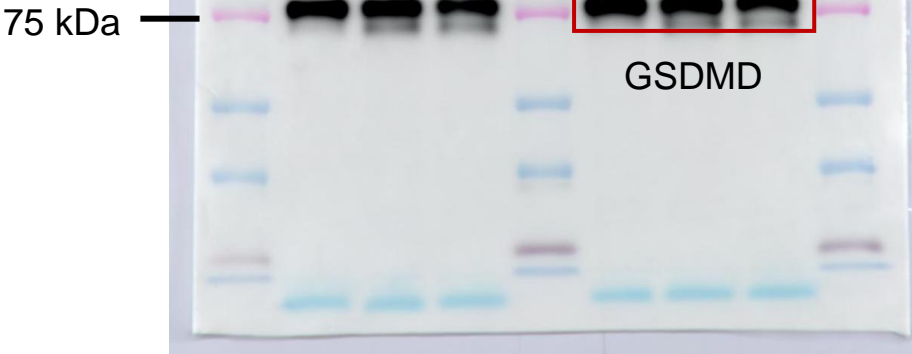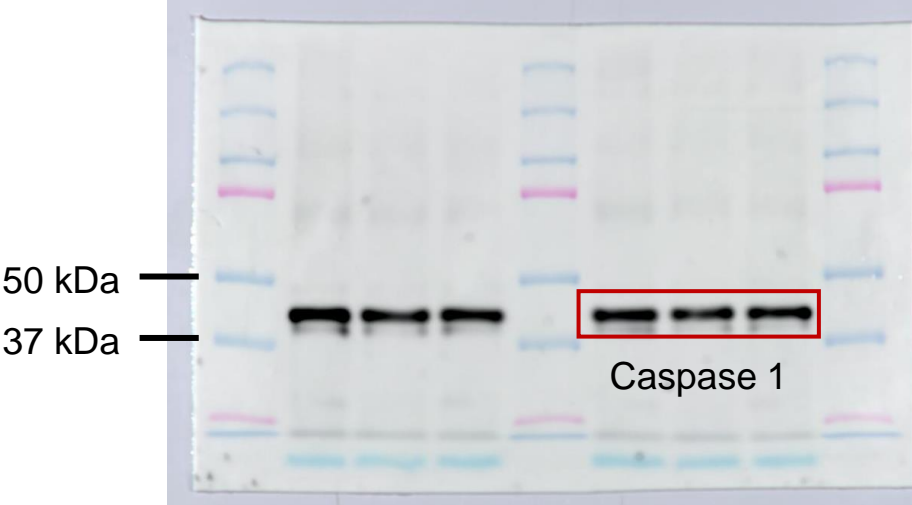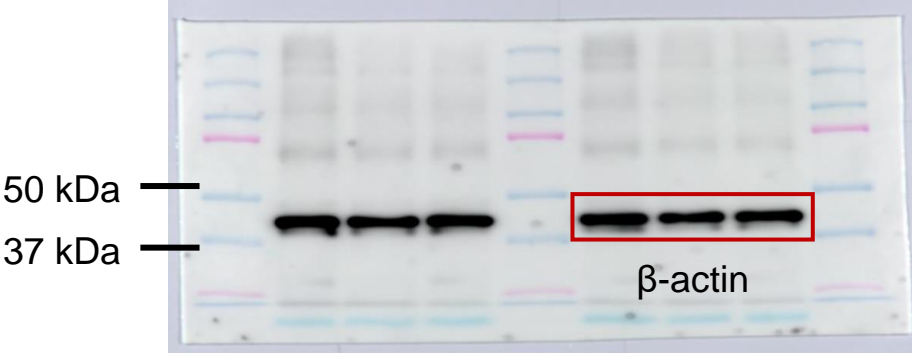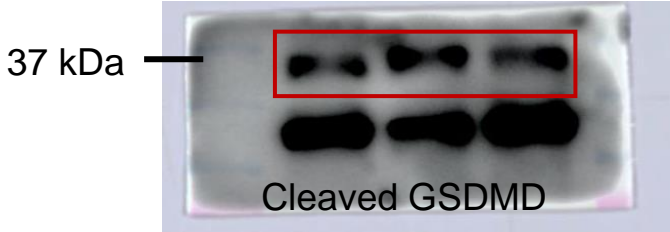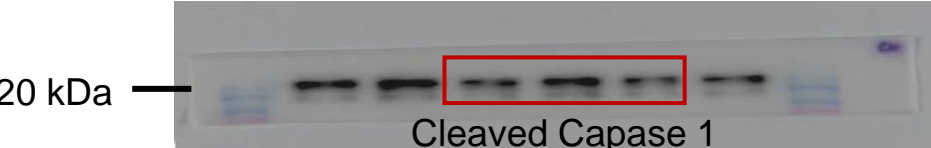

## Fig. 9A

P-Smad2, Smad2, Caspase 1, Cleaved Caspase 1, and  $\beta$ -actin were run on the same gel, cut before incubation with antibodies, and detected using a GE Amersham Imager 800 RGB (EG, USA).

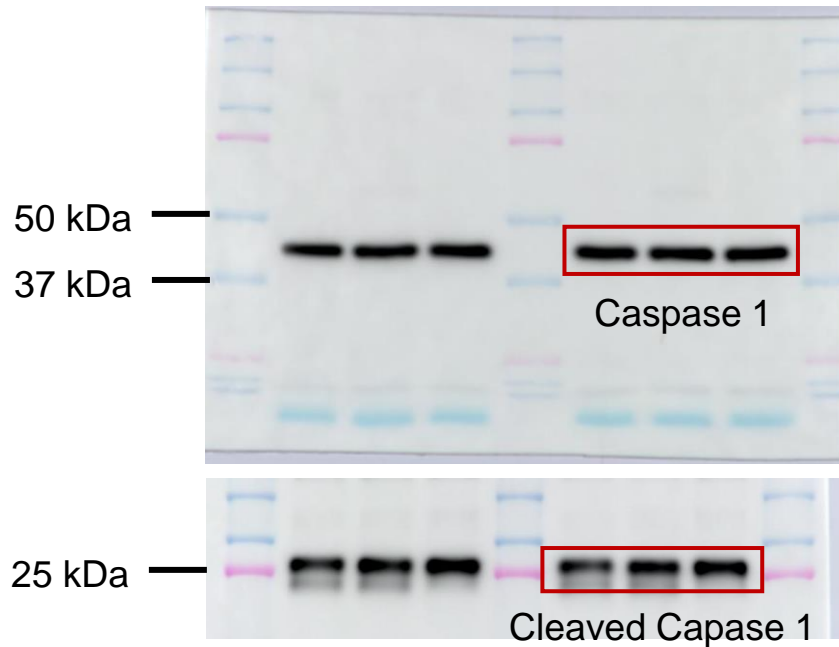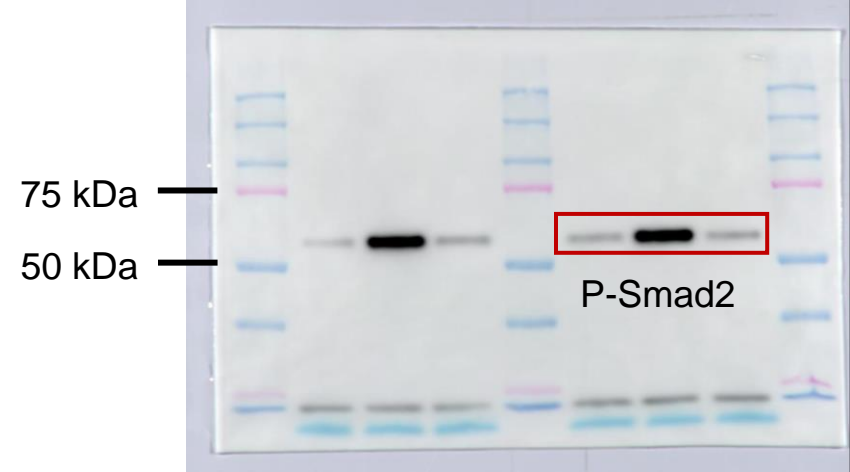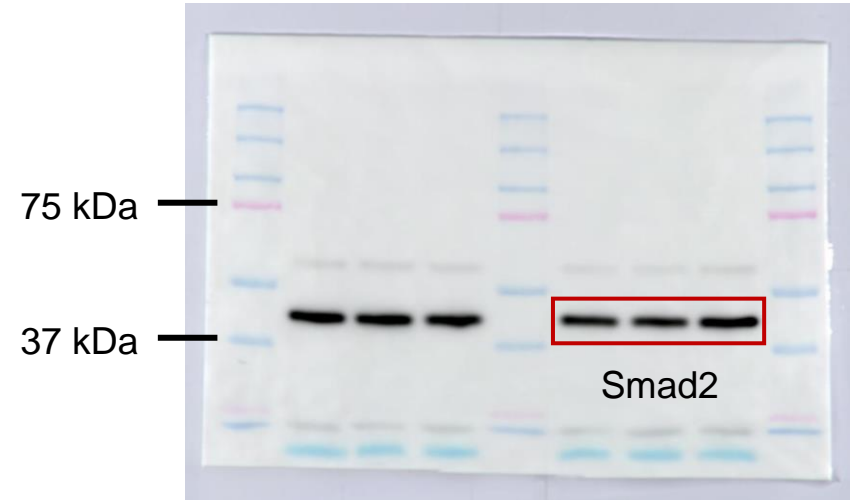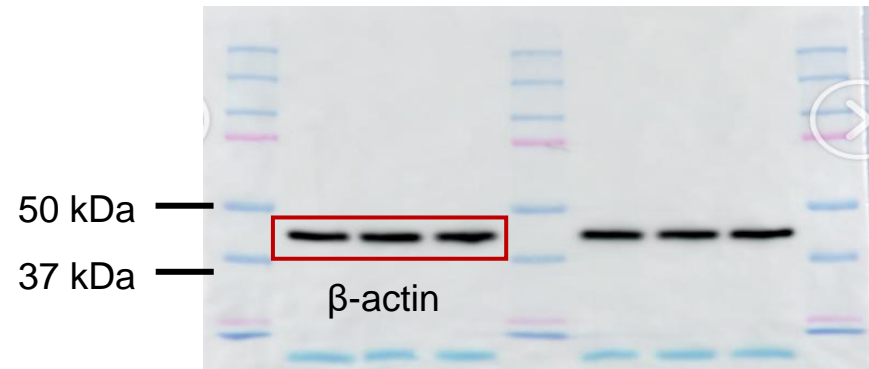

Supplement: pone.0275258.s005.pdf [file pone.0275258.s005.pdf]
